# Supplementary material for: Protective factors for subjective cognitive decline individuals: trajectories and changes in a longitudinal study with Italian elderly
Source: PubMed Central journal article supplement — Eur J Neurol. 2021 Dec 5;29(3):691–7. doi: 10.1111/ene.15183 (PMC9299717; doi:10.1111/ene.15183), 2021-12-05
Supplement: ENE-29-691-s001.pdf [file ENE-29-691-s001.pdf]

## Supplementary Material

### Protective factors for Subjective Cognitive Decline Individuals: Trajectories and changes in a longitudinal study with Italian elderly

*Sara Mondini, Veronica Pucci, Sonia Montemurro & Raffaella Ida Rumiati*

Supplementary Table 1 shows the changing profiles of participants over time. In the Declining group, but not in the Resistant group, the participants' profiles worsened. At T2, 434 participants (79.9% of the total) were Declining and 109 participants (20.1% of the total) were Resistant. At T3, 104 participants (83,2% of the total) were Declining and 21 (16,8% of the total) were Resistant.

| Number of participants | From T1 to T2           |         | Number of participants | From T2 to T3           |         |
|------------------------|-------------------------|---------|------------------------|-------------------------|---------|
| <b>434</b>             | <b><i>Declining</i></b> |         | <b>104</b>             | <b><i>Declining</i></b> |         |
| 13                     | SCD                     | MildND  | 7                      | SCD                     | MildND  |
| 13                     | SCD                     | MajorND | 6                      | SCD                     | MajorND |
| 74                     | MildND                  | MajorND | 30                     | MildND                  | MajorND |
| 302                    | MajorND                 | MajorND | 61                     | MajorND                 | MajorND |
| <b>109</b>             | <b><i>Resistant</i></b> |         | <b>21</b>              | <b><i>Resistant</i></b> |         |
| 35                     | SCD                     | SCD     | 7                      | SCD                     | SCD     |
| 52                     | MildND                  | MildND  | 8                      | MildND                  | MildND  |
| 18                     | MildND                  | SCD     | 6                      | MildND                  | SCD     |
| <b>543</b>             | <b><i>Total</i></b>     |         | <b>125</b>             | <b><i>Total</i></b>     |         |

**Supplementary Table 1** shows the changing profile of participants from T1 to T2 among the total of 543 participants who had a second assessment (T2) and from T2 and T3 among the 125 participants who underwent a third assessment (T3).
